# Supplementary material for: Enhanced photocatalytic removal of U(vi) from water using tea waste biochar/g-C3N4/MoS2 Z-scheme composite: synthesis, performance, and mechanistic insights
Source: Royal Society of Chemistry journal article supplement (doi:10.1039/d3nj05783f), 2024-01-01
Supplement: d3nj05783f1.pdf [file d3nj05783f1.pdf]

# Supplementary Material

for

## **Enhanced Photocatalytic Removal of U(VI) in Water using Tea Waste Biochar/g-C<sub>3</sub>N<sub>4</sub>/MoS<sub>2</sub> Z-Scheme Composite: Synthesis, Performance, and Mechanistic Insights**

LIU Jinxiang<sup>1</sup>, HE Zhiqiang<sup>1</sup>, DUAN Yi<sup>1\*</sup>, WANG Yue<sup>1</sup>, PENG Lin<sup>1</sup>, WANG Jinsong<sup>1</sup>, CAI Pingli<sup>1</sup>

1. School of Civil Engineering, University of South China, Hengyang 421001, China

\*Corresponding authors.

E-mail addresses: duanyi1987@163.com.

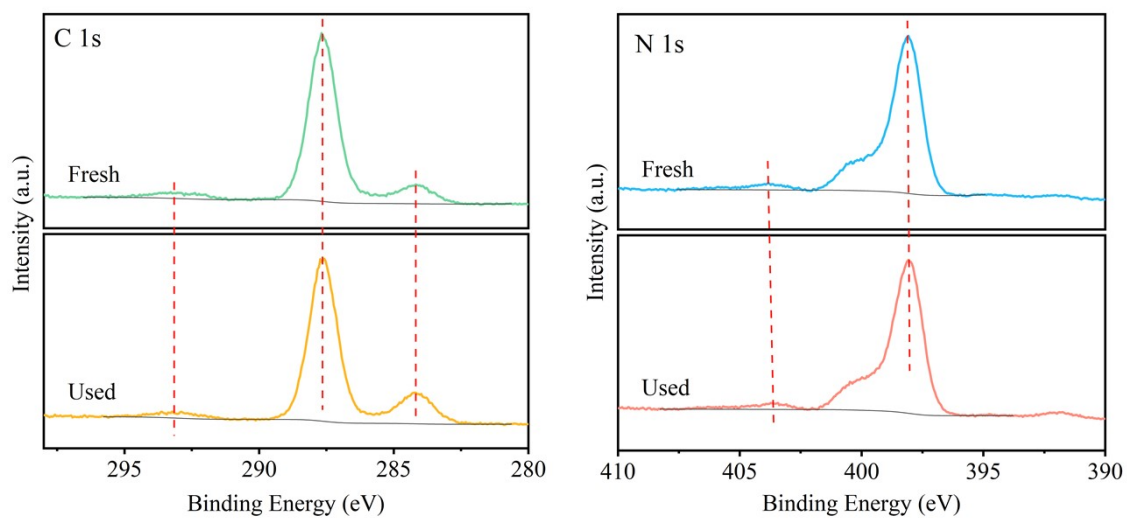

**Figure S1.** (a) C 1s and (b) N 1s XPS spectra of 10% BgM before and after used.
